# Supplementary material
Source: publisher site journal article supplement (https://www.spandidos-publications.com/3603/downloadSupplementary)
Supplement: Supplementary file 1 [file downloadSupplementary]

## Sheet: Sheet1
Table SV. Clinicopathological characteristics of the patients and corresponding methylation and expression levels.
array	Biospecimen	GHSR DNA methylation (%)		mRNA Ghrelin		mRNA In-1 ghrelin		mRNA GHSR1a		mRNA GHSR1b		mRNA GOAT		IHC GHSR1a		IHC GHSR1b		WHO histological classification	age	gender	MG	Masaoka's clinical staging	survival	reccurence
		tumor	normal	tumor	normal	tumor	normal	tumor	normal	tumor	ghrelin	tumor	normal	intensity	proportion	intensity	proportion
1	frozen	49.8		5.97043		0.219834		9.82434		72.3003		1.99191						C	51	F	0	3	1	1
2	frozen	59	20.2	7.24727		3.93106		74.5648		3758.92		8.2268		3	2	3	2	C	55	M	0	2	0	1
3	frozen	6.6		2.33132		0.227083		1.71085		3.18757		0.420691		2	1	1	0	A	50	F	0	1	0	0
4	frozen	69.4	20.4	6.35707	7.50218	0.45566	0.489581	5.74851	0.684823	386.193	46.4063	1.3004	1.962	2	2	3	2	C	60	M	0	2	0	1
5	frozen	61.6	38.8	4.49856	10.548	0.0796157	0.809193	1.4545	1.62338	18.2654	24.7966	0.553579	2.83463					C	58	F	0	4a	0	1
6	frozen	76.2		4.24215		0.129942		15.7083		13.6369		0.698385						C	69	F	0	4b	0	1
7	frozen	60.4		9.62194		0.161374		7.83307		65.1377		0.543761						B3	66	M	0	1	1	0
8	frozen	45.2		5.1473		0.363019		8.35293		58.8857		2.30639		3	1	2	0	B3	28	F	1	4a	0	1
9	frozen	52.2		0.398571		0.376798		3.26815		185.25		1.34058						B3	75	F	0	1	0	0
10	frozen	46.8																B3	64	M	0	2	0	1
11	frozen	49.4		0.901245		0.0983031		291.996		43.0582		0.466293						NECTT	61	M	0	1	0	0
12	frozen	38		1.09207		0.662768		8.47376		19.2548		1.93183						B3	36	M	1	4a	0	1
13	frozen	42.2																C+B2	50	F	1	3	0	1
14	frozen	78		6.98109		0.226248		1.55148		3.14717		1.15494						C	61	M	0	3	0	0
15	frozen	27.4		2.07559		0.244336		8.48597		15.0673		1.35977		3	1	2	2	NECTT	64	M	0	4b	1	1
16	frozen	23.2																B3	47	M	0	3	0	0
17	frozen	20.2		10.2189		0.0327073		1.53967		15.4478		0.706802						A	62	M	0	1	0	0
18	frozen	25.2	19.2	2.02958		0.319918		23.7472		4.49999		0.831151						B3	75	M	0	3	0	0
19	frozen	73		0.42856		16.7065				620.366		32.2066						NECTT	67	M	0	4b	0	1
20	frozen	34		1.72686		0.106629		2.15703		7.94004		1.11885						B3	72	M	0	4a	0	1
21	frozen	38.8																A	80	F	0	1	0	0
22	frozen	57.4		6.65692		0.322162		2.53219		5.2197		0.593036						C	61	F	0	2	0	1
23	frozen			6.74795		0.339832		7.49268		9.15965		1.2706		2	1	2	1	AB	71	F	0	1	0	0
24	frozen	36.4		1.80723		0.761875		0.813326		3.75157		2.58028						B2	74	F	0	2	0	0
25	frozen	37.4	35.4	1.06572		0.840629		0.746809		21.0068		1.64548						B2	65	F	0	2	0	0
26	frozen	27.8	18.4					3.50562		12.5842								B2	43	M	0	4b	0	1
27	frozen	37.8	24.8	5.06677		0.168693		1.11283		30.4204		1.37723						B2	40	M	1	2	0	0
28	frozen	37.8	33.4	3.00367	23.4164	1.53459	0.206304	0.89872	1.63872	89.1474	61.8125	0.798732	3.56434					B2	75	F	0	2	0	0
29	frozen			1.9883	1.83878	1.47519	0.124841	11.0841	0.233692	8.81064	0.877057	3.66973	2.07523	3	1	2	2	AB	62	F	0	2	0	0
30	frozen	45.6		3.77854	0.306678	0.14602	0.172683	2.68835	12.2026	7.8618	50.3196	0.878561	0.126688					C	68	F	0	2	0	0
31	frozen	22.4		8.06452		0.276539		5.82016		8.70487		1.53621		2	2	2	1	B3	68	F	1	2	0	0
32	frozen	53.4	25.8	9.25192	20.8499	1.11007	0.755862	10.2993	4.0424	46.417	20.7499	4.30613	2.13251					C	69	M	0	2	0	0
33	frozen	41.2	37	2.06084		1.13629		32.1003		63.8348		7.38128		2	2	0	0	B1	65	F	0	1	0	0
34	frozen	53.4	25.8	17.3314	4.10925	0.445715	0.100368	0.6688	0.869514	24.1641	2.7928	1.07082	0.983263	2	2	3	2	C	48	F	0	3	0	1
35	frozen	36.6	22.6	2.58823	0.669926	0.293016	0.11091	24.8826	4.47975	653.759	1.18664	0.603923	0.411468	0	0	1	2	B2	40	F	0	2	0	0
36	frozen	26.4	23.4	3.13573		5.49683		98.2834		1951.24		20.0239		2	1	3	1	B2	52	F	1	2	0	0
37	frozen	23.8		1.07916		0.395108		6.23312		63.8569		2.73717						B2	60	F	0	1	0	0
38	frozen	30.2		0.0535799		0.168659		0.532608		11.275		0.904076		1	1	2	1	B1	51	F	1	2	0	0
39	frozen	30.2		1.25133		0.101749		5.58615		5.2245		0.424671						B1	72	F	0	1	0	0
40	frozen			2.46652		0.105627		3.61769		21.7683		0.265066						AB	67	F	1	1	1
41	frozen	31.2		2.02622		0.140268		0.303192		10.2638		1.07322		3	2	2	1	AB	65	F	0	2	0	0
42				0.859282		2.68814						4.93835						AB	56	F	1	2	0	0
43				1.48045	1.35294	4.34984	0.537878	32.8768	0.799698	224.997	16.9784	13.9898	2.58203					B1	39	M	0	1	0	0
44	frozen			3.09108	5.13467	1.1302	0.4198	2.07056	0.0501751	2.73978	0.555917	7.06763	3.78034	2	1	1	0	B2	58	F	0	1	0	0
45	frozen			4.24385		0.668615						0.976189						B1	42	M	0	2
46	frozen			3.44785		1.16605						8.63903						B1	45	F	1	2	0	0
47	frozen			0.139582		9.12158						8.91495						B1	72	F	0	1	0	0
48	frozen	40.8																B2	65	M	1	4a	0	1
49	frozen	32.4	28	9.88216	6.48507	0.4121	0.0896199	0.0440855	0.011937	0.581245	0.481165	1.28509	1.14806	0	0	1	0	A	57	F	1	1	0	0
50				5.81864	3.12232	0.252521	0.038384	1.76482	17.5061	2.37404	4.08038	0.345692	0.343168					C	66	M	0	2	0	0
51	frozen	21.4		6.86663	0.619648	0.306369	0.0369951	0.0780792	0.234574	0.858261	1.95565	0.756918	0.582908					B2	38	F	0	3	0	0
52	frozen	65.4	33.2	1.74318		0.348632		0.304854		3.72488		1.40764		2	1	2	2	NECTT	68	M	0	2	0	0
53	frozen	16.8		59.7478	9.7415	0.102656	0.0760038	2.26192	2.71353	9.25355	9.848	1.03312	0.512485					AB	65	F	0	1	0	0
54	frozen	52.2	23	17.3587		0.687755						0.969548						A	84	M	0	4b	0
55	frozen	37.4	21	1.11655	1.12582	0.370448	0.0488976	0.106128	0.0455071	0.789488	0.846787	0.856649	0.104818	2	1	2	2	B1	65	M	0	3	0	0
56	frozen	46.6	31.2	7.45044	4.23139	0.269708	0.241226	0.0540811	0.0153077	0.707735	0.573567	0.992104	1.86835	2	1	2	1	C	55	F	0	2	0	0
57	frozen			3.31212		1.37326		7.31001		43.8193		2.74714		2	1	2	1	B3	62	M	1	1	0
58	frozen			1.40601	0.117513	0.104662	0.0892297	12.0359	60.5033	9.27682	3.02094	62.3459	9.98671					A	68	M	0	1	0	0
							F; female, M; male, MG; myasthenia gravis 0= without MG, 1= with MG , survival 0= alive, 1=dead, recurrence 0=without recurrence, 1=with recurrence, NECTT; neuroendocrine tumors of the thymus
